# Supplementary material for: A Lévy Risk Model with Ratcheting Dividend Strategy and Historic High-Related Stopping
Source: Hindawi journal article supplement (doi:10.1155/2020/6282869), 2020-03-26
Supplement: f1 [file 6282869.f1.zip]

Archive with 4 entries (4 files):
- 6282869.f1/case1.m
- 6282869.f1/case1_lookfor_optimal_bstar.m
- 6282869.f1/case2.m
- 6282869.f1/case2_lookfor_optimal_bstar.m
