# Supplementary material for: A Lévy Risk Model with Ratcheting Dividend Strategy and Historic High-Related Stopping
Source: Hindawi journal article supplement (doi:10.1155/2020/6282869), 2020-03-26
Supplement: f1 [file 6282869.f1.zip › 6282869.f1/case1.m]

clear all;
close all;
clc;
syms c c1 c2 lambda mu q x b theta1 ksix omiga z sigma ; 
%  sigma c alpha lambda delta gamma mu zeta s t x w1o b; 
for   c1=0.1;
    c2=1;
   % c=2;
% lambda=1;
mu=2;
q=0.01;
sigma=5; 

  %ÏÂÃæÒ»ÐÐÖÐµÄxiº¯ÊýÒ»¹²ÓÐÈýÖÖÇé¿ö£¬0.5*x-0.2£»0.2*x-0.2£»0
ksix=0.5*x-0.2;
%ksix=0.2*x-0.2;
%ksix=0;
ksiBarx=x-ksix;

K=1/((mu-c1)^2+2*sigma*sigma*q)^0.5;

theta1=(c1-mu+sqrt((mu-c1)^2+2*sigma*sigma*q))/sigma^2;
theta2=(c1-mu-sqrt((mu-c1)^2+2*sigma*sigma*q))/sigma^2;

%%%%%%ÏÂÃæÊÇ¹ØÓÚthetacurve
Kcurve=1/((mu-c1-c2)^2+2*sigma*sigma*q)^0.5;

theta1curve=(c1+c2-mu+sqrt((mu-c1-c2)^2+2*sigma*sigma*q))/sigma^2;
theta2curve=(c1+c2-mu-sqrt((mu-c1-c2)^2+2*sigma*sigma*q))/sigma^2;

 %%%%%%%%%%%ÏÂÃæ·Ö±ð¸ø³öWq£¨x£©£¬WWq£¨x£©£»Zq£¨x£©£¬ZZq£¨x£©
 Wqx=K*(exp(theta1*x)-exp(theta2*x));
WWqx=Kcurve*(exp(theta1curve*x)-exp(theta2curve*x));

 Zqx=q*Wqx/theta1+exp(theta2*x);
 ZZqx=q*WWqx/theta1curve+exp(theta2curve*x);
 
% K
% theta1
% theta2
% Kcurve
% theta1curve
% theta2curve
%  Wqx
%  WWqx
%   Zqx
%  ZZqx


%%%%%%%%%%%ÏÂÃæ·Ö±ð¸ø³öËÄ¸öº¯Êý£ºRouksi£¨x£©£¬lksi£¨x£©£»Roucurve_ksi£¨x£©£¬lcurveksi£¨x£©
 Roux=(theta1*exp(theta1*x)-theta2*exp(theta2*x))/(exp(theta1*x)-exp(theta2*x));
 Lx=Roux*Zqx-q*Wqx;
 Roucurvex=(theta1curve*exp(theta1curve*x)-theta2curve*exp(theta2curve*x))/(exp(theta1curve*x)-exp(theta2curve*x));
 Lcurvex=Roucurvex*ZZqx-q*WWqx;
% % 
%  Roux
%  Lx
%  Roucurvex
%  Lcurvex


%%%%%% Òª°ÑÉÏÃæµÄËÄ¸ö±äÁ¿ÖÐµÄ x ÖÃ»»³É ksiBarx
Rouksix=subs(Roux,x,ksiBarx);
Lksix=subs(Lx,x,ksiBarx);
Roucurveksix=subs(Roucurvex,x,ksiBarx);
Lcurveksix=subs(Lcurvex,x,ksiBarx);
% 
% Rouksix
% Lksix
% Roucurveksix
% Lcurveksix
 
% ÏÂÃæ¿ªÊ¼¼ÆËãVksixµÄ¾ßÌåÖµ
       Rouomiga=subs(Roucurveksix,x,omiga);
       h2z=subs(Lcurveksix,x,z);  
       h3z=subs(Lksix,x,z);
       
data=zeros(length(60),2);
    idx=1;
         x=1;
   for   b=[0,0.3,0.6,0.8,1,1.02,1.05,1.08,1.1,1.15,1.2,1.35,1.45,1.6,1.8,2.0,2.5,3,3.5,4,4.5,5,5.5,5.8,6,6.5,7,7.5,8,8.5,8.8,9,9.5,10,10.5,10.8,11,11.5,12,12.5,13,13.5,14,14.5,15,16,17,18,19,20,21,22,23,24,25,26,27,28,29,30,35,40,45,50,55,60,70,80,90,100]; 
% %ÉÏÒ»ÐÐÎªÁË½«bÔÚ1ÓÒ²àµÄÈ¡Öµ¸üÃÜ¼¯Ð©£¬¿ÉÈ¡ÔÙÔËÐÐ£¨ÉÏÃælengthÀ¨ºÅÖÐ»»³É50£¬ÒòÎªbÈ¡ÁË50¸öÊý×Ö£©£©
%  ÔÙ×¢£ºÏÂÃæËÄÐÐÒ²¿ÉÒÔÖ±½Ó½«²½³¤ÉèµÄ·Ç³£¶Ì£¨¼û×¢ÊÍÓï¾äÏÂÃæËÄÐÐ£©À´ÔËÐÐ£¬ÓÉÓÚÔËËã·Ç³£Âý£¬ÎÒÃÇ¸ø³öÁËÕâÐ©ÌØÀýµÄÈ¡Öµ¡£
% data=zeros(length(0:0.1:30),2);
%     idx=1;
%          x=1;
%    for   b=0:0.1:30;

 % ÏÂÃæ¿ªÊ¼£¨Ö±µ½ÏÂÃæµÚ¶þ¸öend£©¼ÆËãVksixµÄÖµÁË£»ÏÂÈýÐÐÊ×ÏÈ¼ÆËãÔÚÌØÊâµãb´¦VµÄÖµ
      h1b=exp(-int(Rouomiga,omiga,b,z));
      hb=h1b*h2z;                 %Ã»ÓÐÓÃµÄ£º   h1z=exp(-quad(Roucurveksix,x,z))
Vksib=(c1+c2)*(1-int(hb,z,b,inf))/q;
           %    Vksib=Vksix;
% result=[b,Vksib];
%  result=vpa(result,5); 
 %  end 
 
     if x>=b;
h1z=exp(-int(Rouomiga,omiga,x,z));
hz=h1z*h2z;                 %Ã»ÓÐÓÃµÄ£º   h1z=exp(-quad(Roucurveksix,x,z))
Vksix=(c1+c2)*(1-int(hz,z,x,inf))/q;
Vksix=vpa(Vksix,4)
% result=[x,Vksix];
% result=vpa(result,5);


%      else if x=b;
%       h1b=exp(-int(Rouomiga,omiga,b,z));
%       hb=h1b*h2z;                 %Ã»ÓÐÓÃµÄ£º   h1z=exp(-quad(Roucurveksix,x,z))
% Vksix=(c1+c2)*(1-int(hb,z,b,inf))/q;
%      Vksib=Vksix;
% result=[x,Vksix];
%  result=vpa(result,5) 

         else if x<b
                  h1y=exp(-int(Rouomiga,omiga,x,z));  
                    h2y=exp(-int(Rouomiga,omiga,x,b));
                  hz=h1y*h3z;                 %Ã»ÓÐÓÃµÄ£º   h1z=exp(-quad(Roucurveksix,x,z))
Vksix=c1/q-c1*(-int(hz,z,x,b))/q+h2y*(Vksib-c1/q);
Vksix=vpa(Vksix,4); 
% result=[x,Vksix];
%  result=vpa(result,5)     
         end
     end
    data(idx,1)=b;
    data(idx,2)=Vksix;
        idx=idx+1;
 end
 data
 %=data(:,2)
end
% plot(x,Vksix)
